# Supplementary material for: Structure–property relations in anion deficient 5H- and 3C-polytype Ba(Ti,Co)O3−δ perovskites
Source: Royal Society of Chemistry journal article supplement (doi:10.1039/c2jm31936e), 2012-01-01
Supplement: c2jm31936e.pdf [file c2jm31936e.pdf]

***Structure-property relations in anion deficient 5H and 3C polytype Ba(Ti,Co)O<sub>3-δ</sub>  
perovskites.***

Laura Miranda<sup>a,b</sup>, Khalid Boulahya<sup>a</sup>, Derek C Sinclair<sup>b</sup>, María Hernando<sup>a</sup>, Aurea Varela<sup>a</sup>, Jose M. González-Calbet<sup>a</sup> and Marina Parras<sup>a,\*</sup>.

Dr. M. Parras\*

Departamento de Química Inorgánica, Facultad de Químicas, Universidad Complutense,  
E-28040 Madrid Spain

**e-mail:** mparras@quim.ucm.es

**Fax:** (34) 91 394 43 52

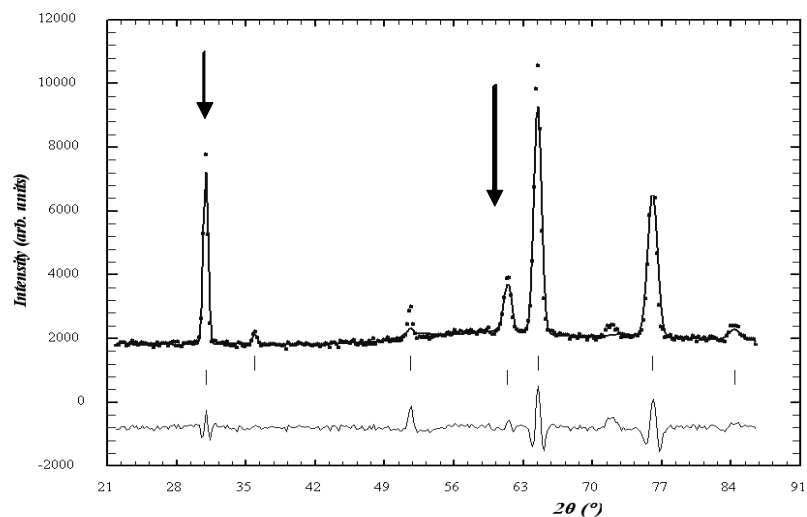

1. Observed, calculated and difference profile of neutron diffraction pattern for 3C-BaTi<sub>0.1</sub>Co<sub>0.9</sub>O<sub>2.6</sub> at 20 K. The arrows mark the magnetic Bragg peaks. The \* marks correspond to Vanadium from the cryostat.

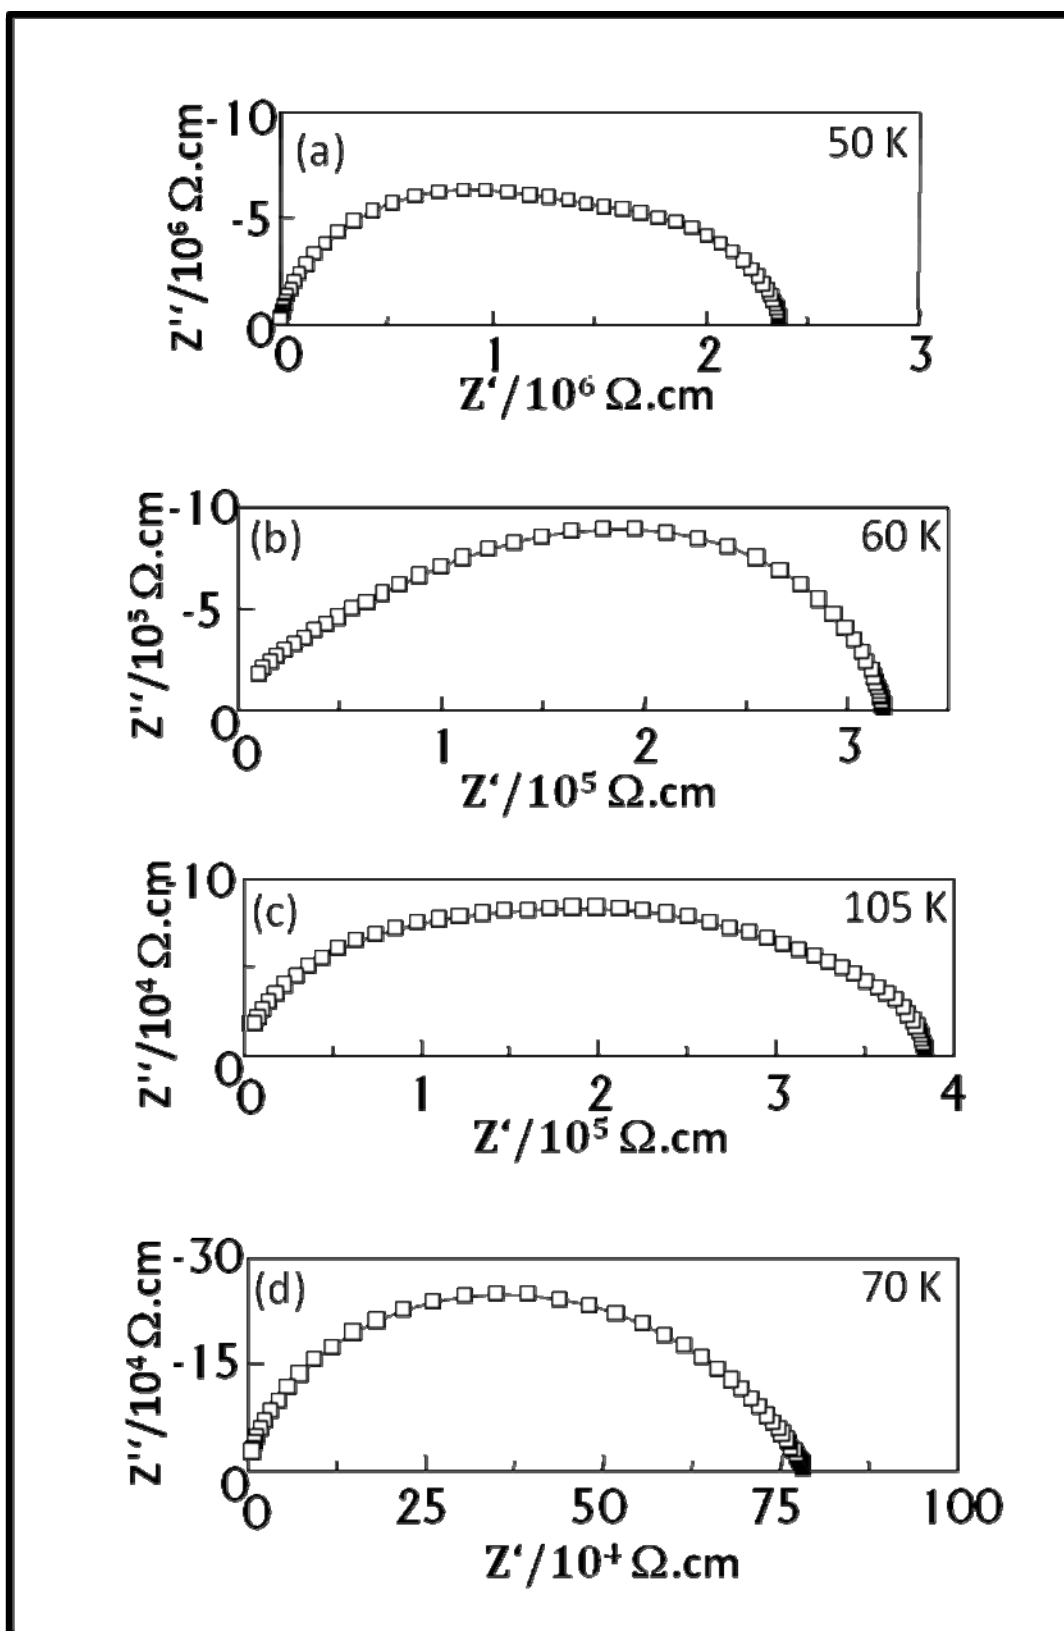

2.  $Z^*$  plot at 50, 60, 105 and 70 K for 5H-BaTi<sub>1-y</sub>Co<sub>y</sub>O<sub>3- $\delta$</sub>  polytypes: (a)  $y = 0.8$  and (b)  $y = 0.9$  and 3C-perovskites: (c)  $y = 0.8$  and (d)  $y = 0.9$ , respectively.
